# Supplementary material for: Bis(amido) rare-earth complexes coordinated by tridentate amidinate ligand: synthesis, structure and catalytic activity in the polymerization of isoprene and rac-lactide
Source: Royal Society of Chemistry journal article supplement (doi:10.1039/c5ra27960g), 2016-01-01
Supplement: c5ra27960g1.pdf [file c5ra27960g1.pdf]

## Electronic supplementary material

# Bis(amido) Rare-earth Complexes Coordinated by Tridentate Amidinate Ligand: Synthesis, Structure and Catalytic Activity in Polymerization of Isoprene and *rac*-Lactide

Aleksei O. Tolpygin, Olesya A. Linnikova, Tatyana A. Glukhova, Anton V. Cherkasov, Georgy K.

Fukin, Alexander A. Trifonov\*

*Institute of Organometallic Chemistry of Russian Academy of Sciences, Tropinina 49, GSP-445, 630950, Nizhny Novgorod (Russia) Fax: 007831 4627497; Tel: 007 831 4623532; E-mail: trif@iomc.ras.ru*

### Contents:

**Table 1S.** Crystallographic data and structure refinement details for **2–4**.

**Figure 1S.**  $^1\text{H}$  NMR spectrum of  $\{2\text{-}[\text{Ph}_2\text{P}(\text{O})]\text{C}_6\text{H}_4\text{NC}(t\text{Bu})\text{N}(2,6\text{-Me}_2\text{C}_6\text{H}_3)\}\text{Y}(\text{N}(\text{SiMe}_3)_2)_2$  (**2**).

**Figure 2S.**  $^{13}\text{C}$  NMR spectrum of  $\{2\text{-}[\text{Ph}_2\text{P}(\text{O})]\text{C}_6\text{H}_4\text{NC}(t\text{Bu})\text{N}(2,6\text{-Me}_2\text{C}_6\text{H}_3)\}\text{Y}(\text{N}(\text{SiMe}_3)_2)_2$  (**2**).

**Figure 3S.**  $^{31}\text{P}$  NMR spectrum of  $\{2\text{-}[\text{Ph}_2\text{P}(\text{O})]\text{C}_6\text{H}_4\text{NC}(t\text{Bu})\text{N}(2,6\text{-Me}_2\text{C}_6\text{H}_3)\}\text{Y}(\text{N}(\text{SiMe}_3)_2)_2$  (**2**).

**Figure 4S.** IR spectrum of  $\{2\text{-}[\text{Ph}_2\text{P}(\text{O})]\text{C}_6\text{H}_4\text{NC}(t\text{Bu})\text{N}(2,6\text{-Me}_2\text{C}_6\text{H}_3)\}\text{Y}(\text{N}(\text{SiMe}_3)_2)_2$  (**2**).

**Figure 5S.** IR spectrum of  $\{2\text{-}[\text{Ph}_2\text{P}(\text{O})]\text{C}_6\text{H}_4\text{NC}(t\text{Bu})\text{N}(2,6\text{-Me}_2\text{C}_6\text{H}_3)\}\text{Nd}(\text{N}(\text{SiMe}_3)_2)_2$  (**3**).

**Figure 6S.**  $^1\text{H}$  NMR spectrum of  $\{2\text{-}[\text{Ph}_2\text{P}(\text{O})]\text{C}_6\text{H}_4\text{NC}(t\text{Bu})\text{N}(2,6\text{-Me}_2\text{C}_6\text{H}_3)\}\text{La}(\text{N}(\text{SiMe}_3)_2)_2$  (**4**).

**Figure 7S.**  $^{13}\text{C}$  NMR spectrum of  $\{2\text{-}[\text{Ph}_2\text{P}(\text{O})]\text{C}_6\text{H}_4\text{NC}(t\text{Bu})\text{N}(2,6\text{-Me}_2\text{C}_6\text{H}_3)\}\text{La}(\text{N}(\text{SiMe}_3)_2)_2$  (**4**).

**Figure 8S.**  $^{31}\text{P}$  NMR spectrum of  $\{2\text{-}[\text{Ph}_2\text{P}(\text{O})]\text{C}_6\text{H}_4\text{NC}(t\text{Bu})\text{N}(2,6\text{-Me}_2\text{C}_6\text{H}_3)\}\text{La}(\text{N}(\text{SiMe}_3)_2)_2$  (**4**).

**Figure 9S.** IR spectrum of  $\{2\text{-}[\text{Ph}_2\text{P}(\text{O})]\text{C}_6\text{H}_4\text{NC}(t\text{Bu})\text{N}(2,6\text{-Me}_2\text{C}_6\text{H}_3)\}\text{La}(\text{N}(\text{SiMe}_3)_2)_2$  (**4**).

**Table 1S.** Crystallographic data and structure refinement details for **2–4**.

| Compound                                        | <b>2</b>                                                           | <b>3</b>                                                            | <b>4</b>                                                            |
|-------------------------------------------------|--------------------------------------------------------------------|---------------------------------------------------------------------|---------------------------------------------------------------------|
| Empirical formula                               | C <sub>43</sub> H <sub>68</sub> N <sub>4</sub> OPSi <sub>4</sub> Y | C <sub>43</sub> H <sub>68</sub> N <sub>4</sub> OPSi <sub>4</sub> Nd | C <sub>43</sub> H <sub>68</sub> N <sub>4</sub> OPSi <sub>4</sub> La |
| Formula weight                                  | 889.25                                                             | 944.58                                                              | 939.25                                                              |
| T [K]                                           | 100(2)                                                             |                                                                     |                                                                     |
| Wavelength [Å]                                  | 0.71073                                                            |                                                                     |                                                                     |
| Crystal system                                  | Monoclinic                                                         |                                                                     |                                                                     |
| Space group                                     | C2/c                                                               |                                                                     |                                                                     |
| a [Å]                                           | 21.2784(9)                                                         | 21.4494(2)                                                          | 21.5190(6)                                                          |
| b [Å]                                           | 12.6709(5)                                                         | 12.75910(10)                                                        | 12.7854(3)                                                          |
| c [Å]                                           | 36.8622(15)                                                        | 37.4670(4)                                                          | 36.8722(10)                                                         |
| α [°]                                           | 90                                                                 | 90                                                                  | 90                                                                  |
| β [°]                                           | 105.1430(10)                                                       | 108.1100(10)                                                        | 105.513(3)                                                          |
| γ [°]                                           | 90                                                                 | 90                                                                  | 90                                                                  |
| Volume [Å <sup>3</sup> ]                        | 9593.6(7)                                                          | 9745.82(17)                                                         | 9775.1(5)                                                           |
| Z                                               | 8                                                                  | 8                                                                   | 8                                                                   |
| ρ <sub>calcd.</sub> [g cm <sup>-3</sup> ]       | 1.231                                                              | 1.288                                                               | 1.276                                                               |
| Absorption coefficient [mm <sup>-1</sup> ]      | 1.384                                                              | 1.231                                                               | 1.039                                                               |
| F(000)                                          | 3776                                                               | 3944                                                                | 3920                                                                |
| Crystal size [mm]                               | 0.42×0.25×0.18                                                     | 0.45×0.30×0.15                                                      | 0.42×0.25×0.18                                                      |
| θ range for data collection [°]                 | 1.90 to 29.00                                                      | 3.16 to 29.00                                                       | 3.16 to 29.00                                                       |
| Index ranges                                    | -28≤h≤28,<br>-17≤k≤16,<br>-49≤l≤49                                 | -29≤h≤29,<br>-17≤k≤17,<br>-51≤l≤51                                  | -29≤h≤28,<br>-17≤k≤17,<br>-50≤l≤46                                  |
| Reflections collected                           | 50161                                                              | 93016                                                               | 28859                                                               |
| Independent reflections                         | 12692                                                              | 12919                                                               | 12946                                                               |
| R <sub>int</sub>                                | 0.0415                                                             | 0.0420                                                              | 0.0577                                                              |
| Completeness to θ [%]                           | 99.8                                                               | 99.8                                                                | 99.7                                                                |
| Data/restraints/parameters                      | 12692 / 0 / 504                                                    | 12919 / 0 / 504                                                     | 12946 / 0 / 504                                                     |
| Goodness-of-fit on F <sup>2</sup>               | 1.043                                                              | 1.123                                                               | 1.024                                                               |
| Final R indices [I>2σ(I)]                       | R <sub>1</sub> = 0.0394,<br>wR <sub>2</sub> = 0.0857               | R <sub>1</sub> = 0.0287,<br>wR <sub>2</sub> = 0.0592                | R <sub>1</sub> = 0.0531,<br>wR <sub>2</sub> = 0.0746                |
| R indices (all data)                            | R <sub>1</sub> = 0.0604,<br>wR <sub>2</sub> = 0.0911               | R <sub>1</sub> = 0.0335,<br>wR <sub>2</sub> = 0.0606                | R <sub>1</sub> = 0.0849,<br>wR <sub>2</sub> = 0.0811                |
| Largest diff. peak and hole [eÅ <sup>-3</sup> ] | 0.555 / -0.393                                                     | 0.686 / -1.111                                                      | 0.780 / -1.127                                                      |

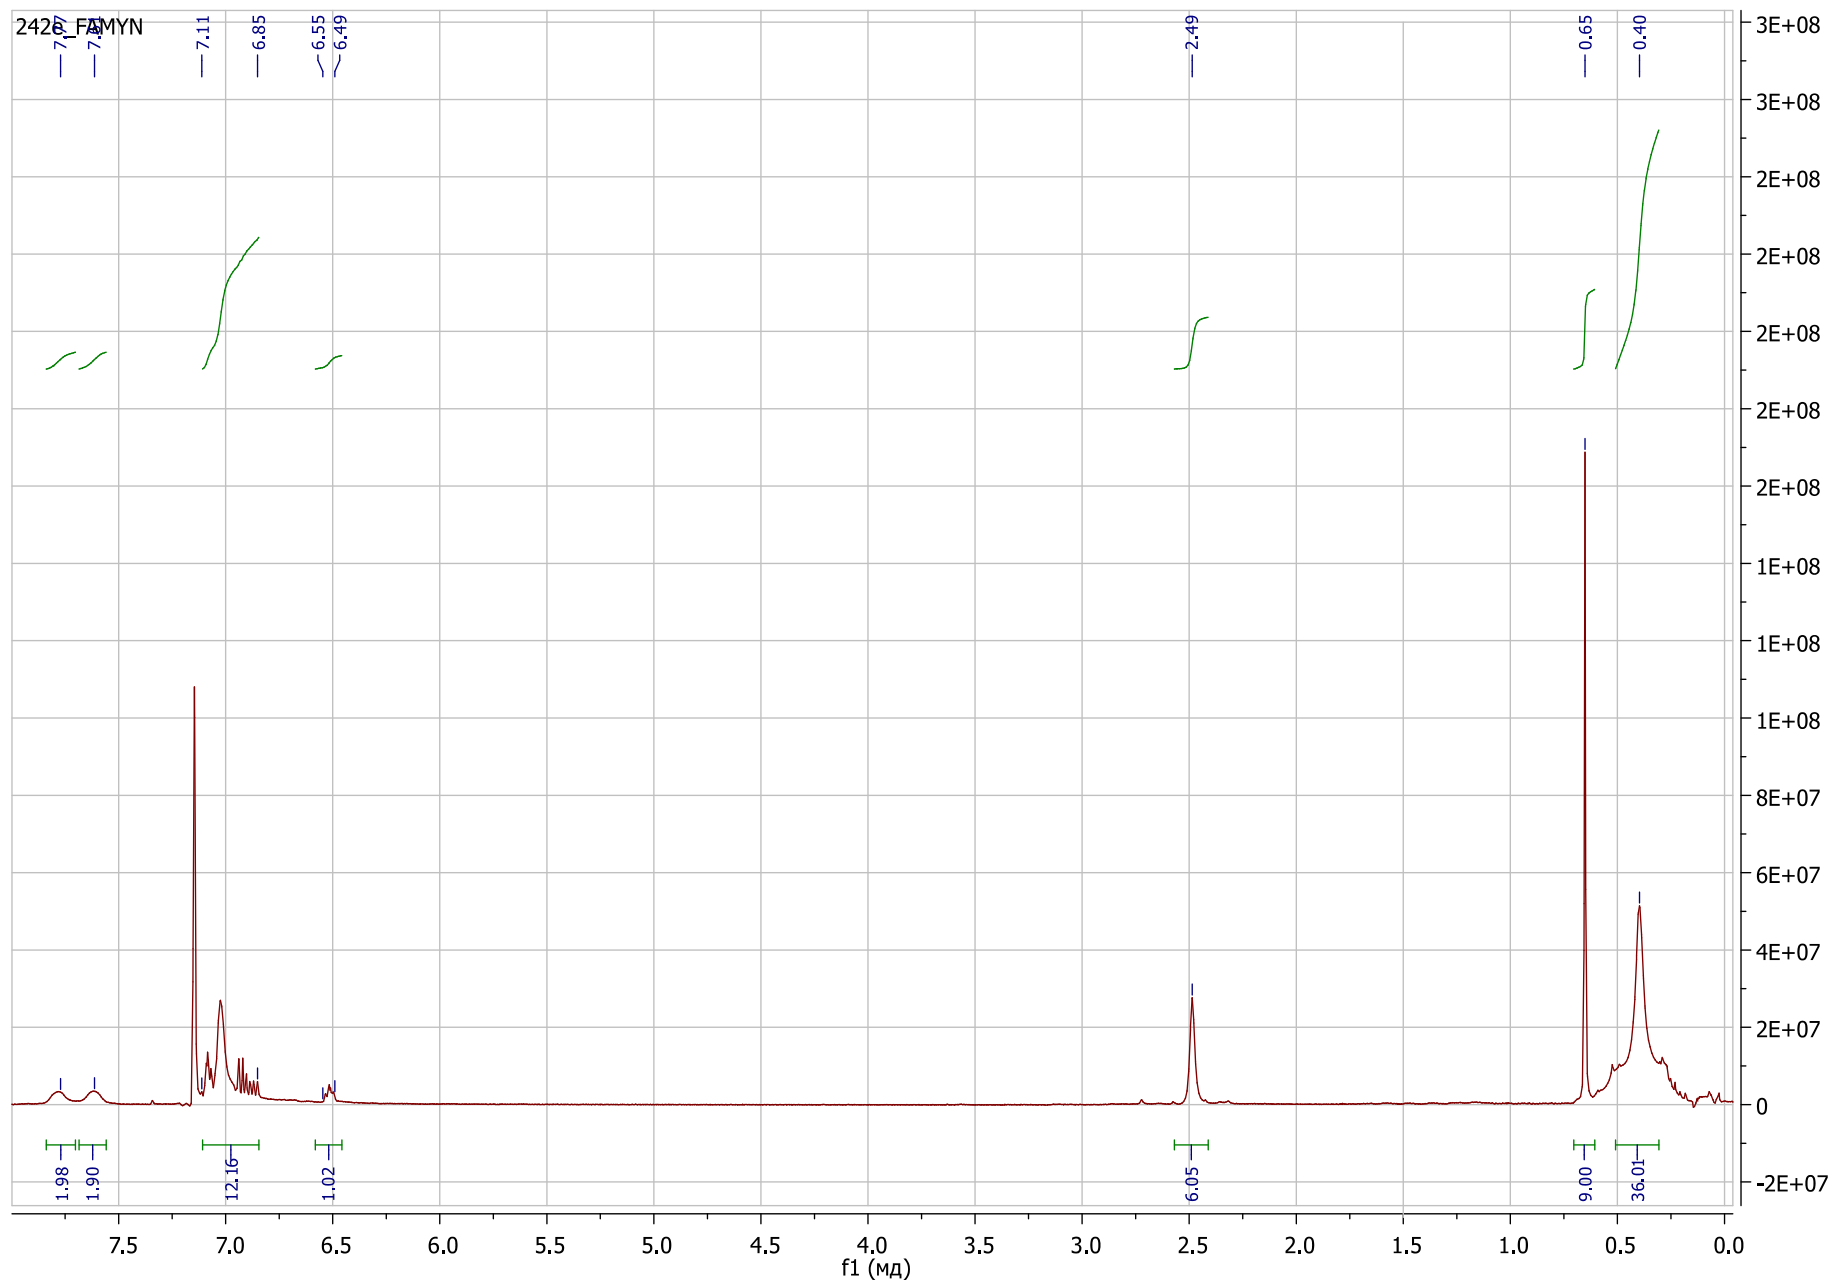

**Figure 1S.**  $^1\text{H}$  NMR spectrum of  $\{2\text{-}[\text{Ph}_2\text{P}(\text{O})\text{C}_6\text{H}_4\text{NC}(t\text{Bu})\text{N}(2,6\text{-Me}_2\text{C}_6\text{H}_3)]\text{Y}(\text{N}(\text{SiMe}_3)_2)_2$  (**2**).

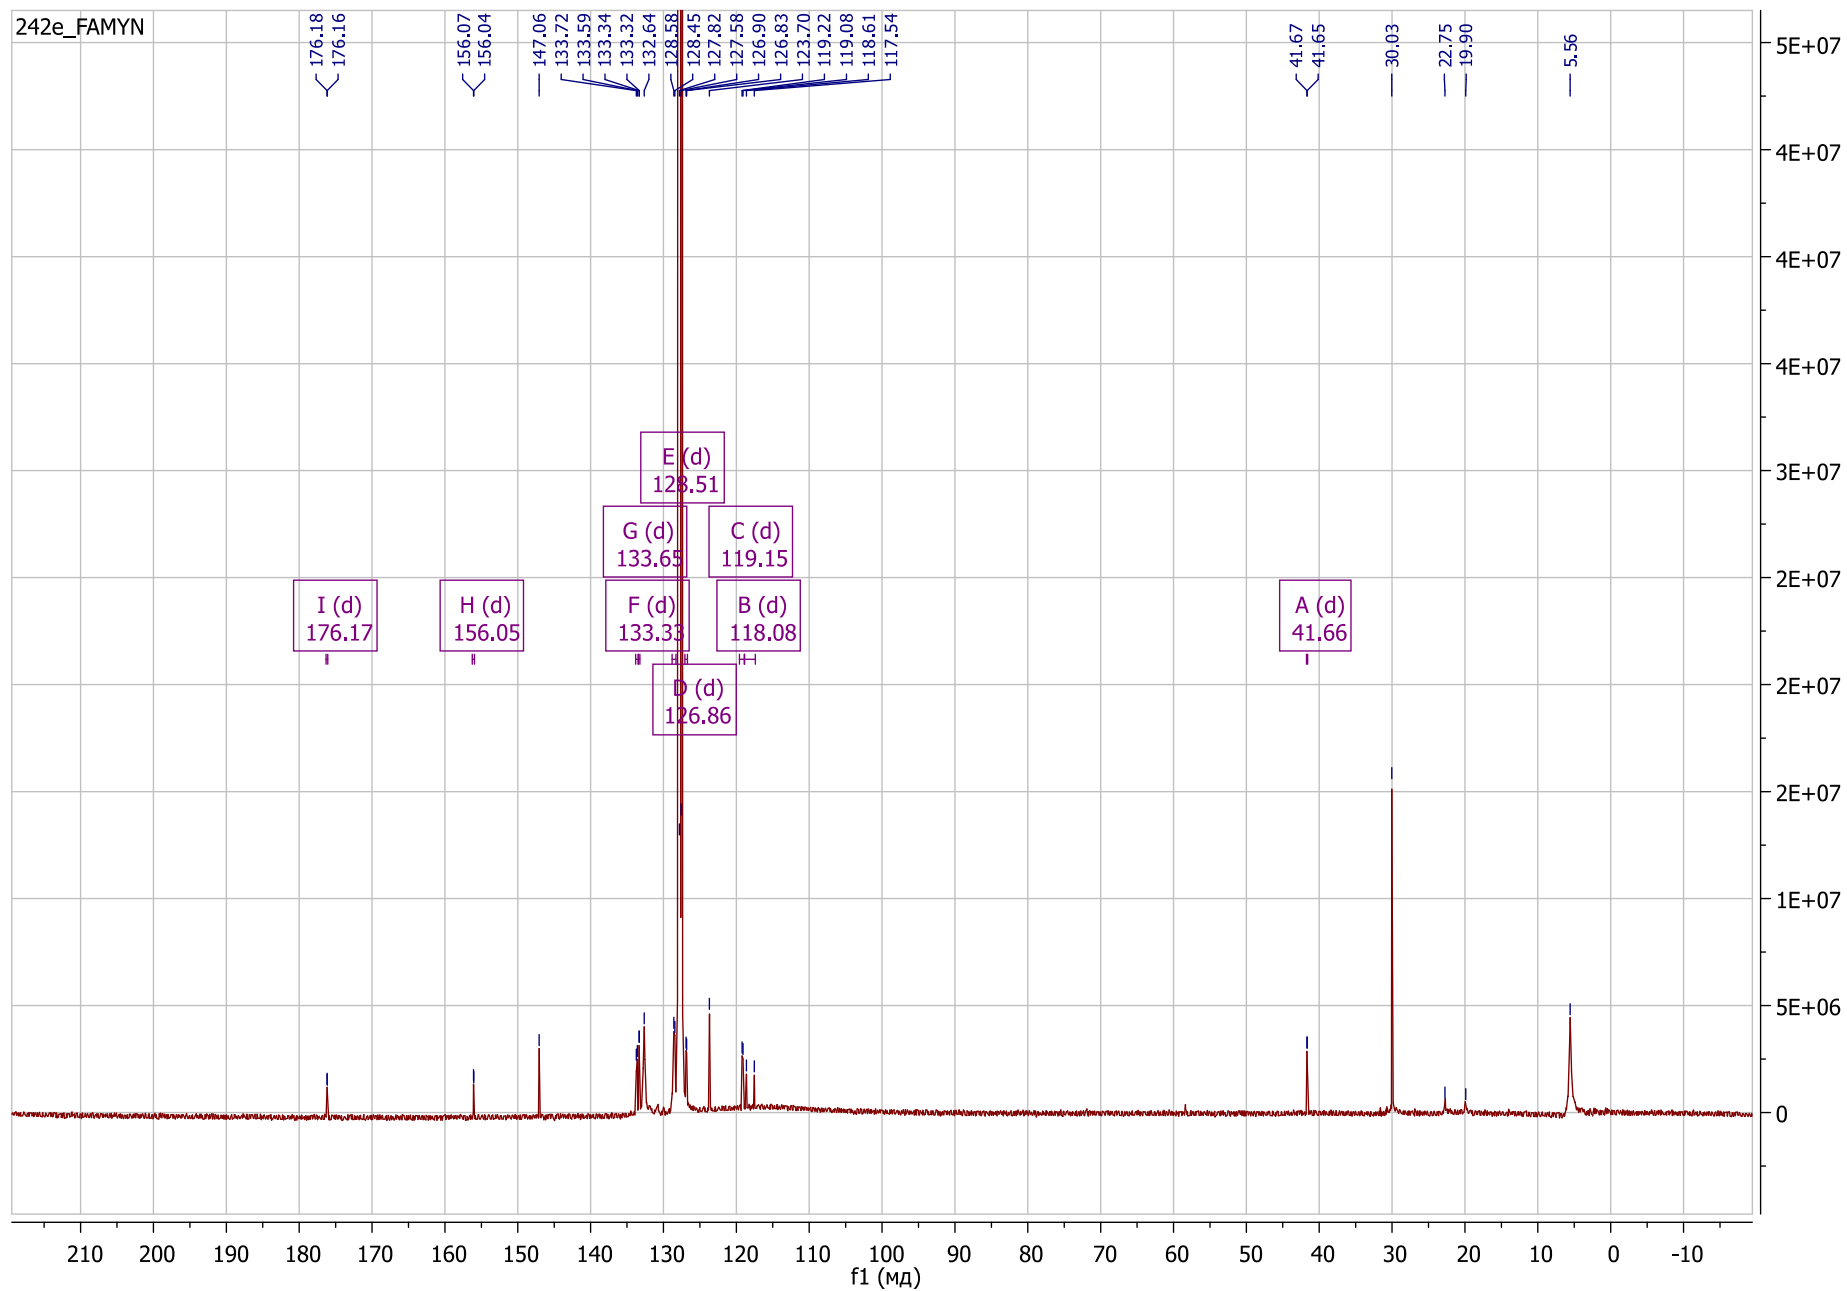

**Figure 2S.**  $^{13}\text{C}$  NMR spectrum of  $\{2\text{-}[\text{Ph}_2\text{P}(\text{O})]\text{C}_6\text{H}_4\text{NC}(\text{tBu})\text{N}(2,6\text{-Me}_2\text{C}_6\text{H}_3)\}\text{Y}(\text{N}(\text{SiMe}_3)_2)_2$  (**2**).

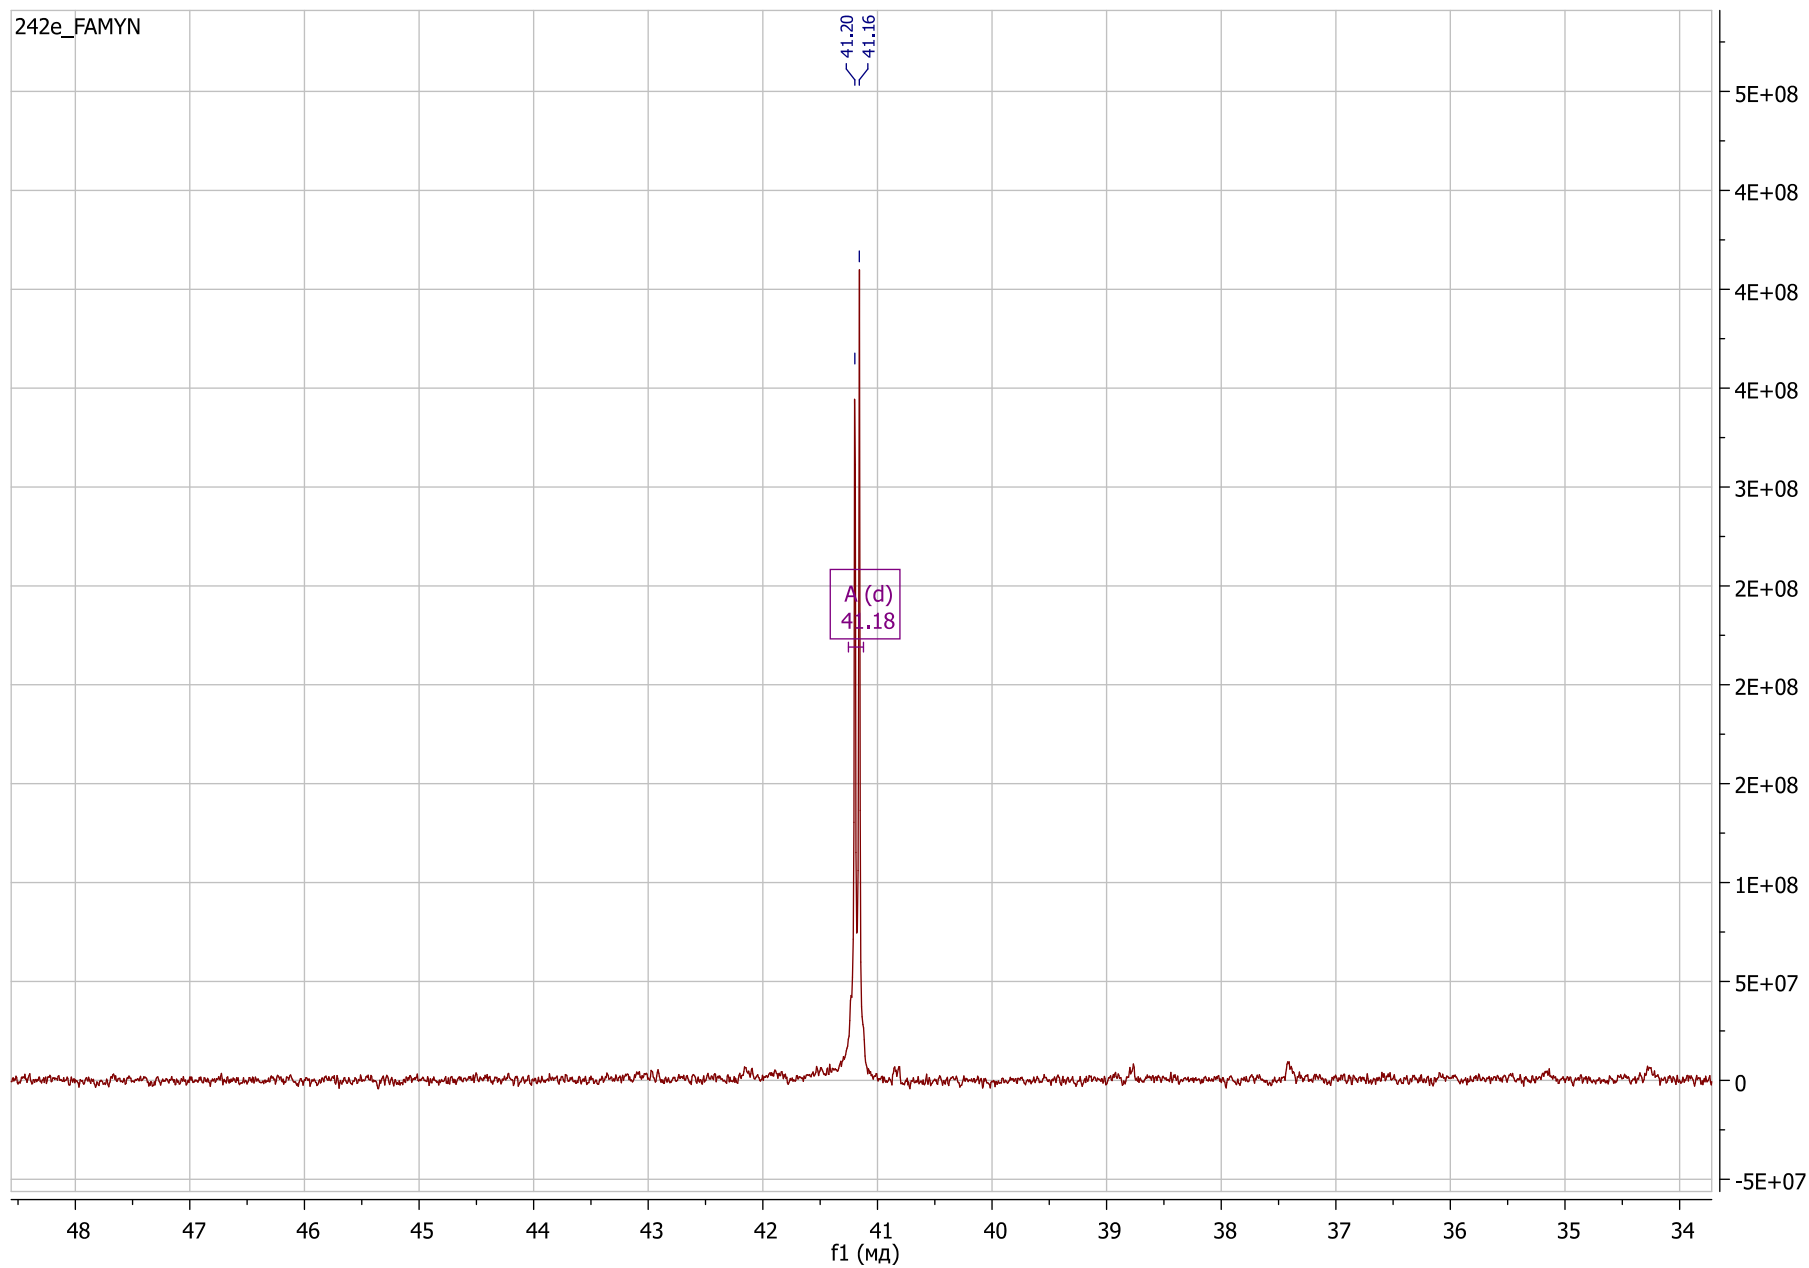

**Figure 3S.**  $^{31}\text{P}$  NMR spectrum of  $\{2\text{-}[\text{Ph}_2\text{P}(\text{O})\text{C}_6\text{H}_4\text{NC}(t\text{Bu})\text{N}(2,6\text{-Me}_2\text{C}_6\text{H}_3)]\text{Y}(\text{N}(\text{SiMe}_3)_2)_2$  (**2**).

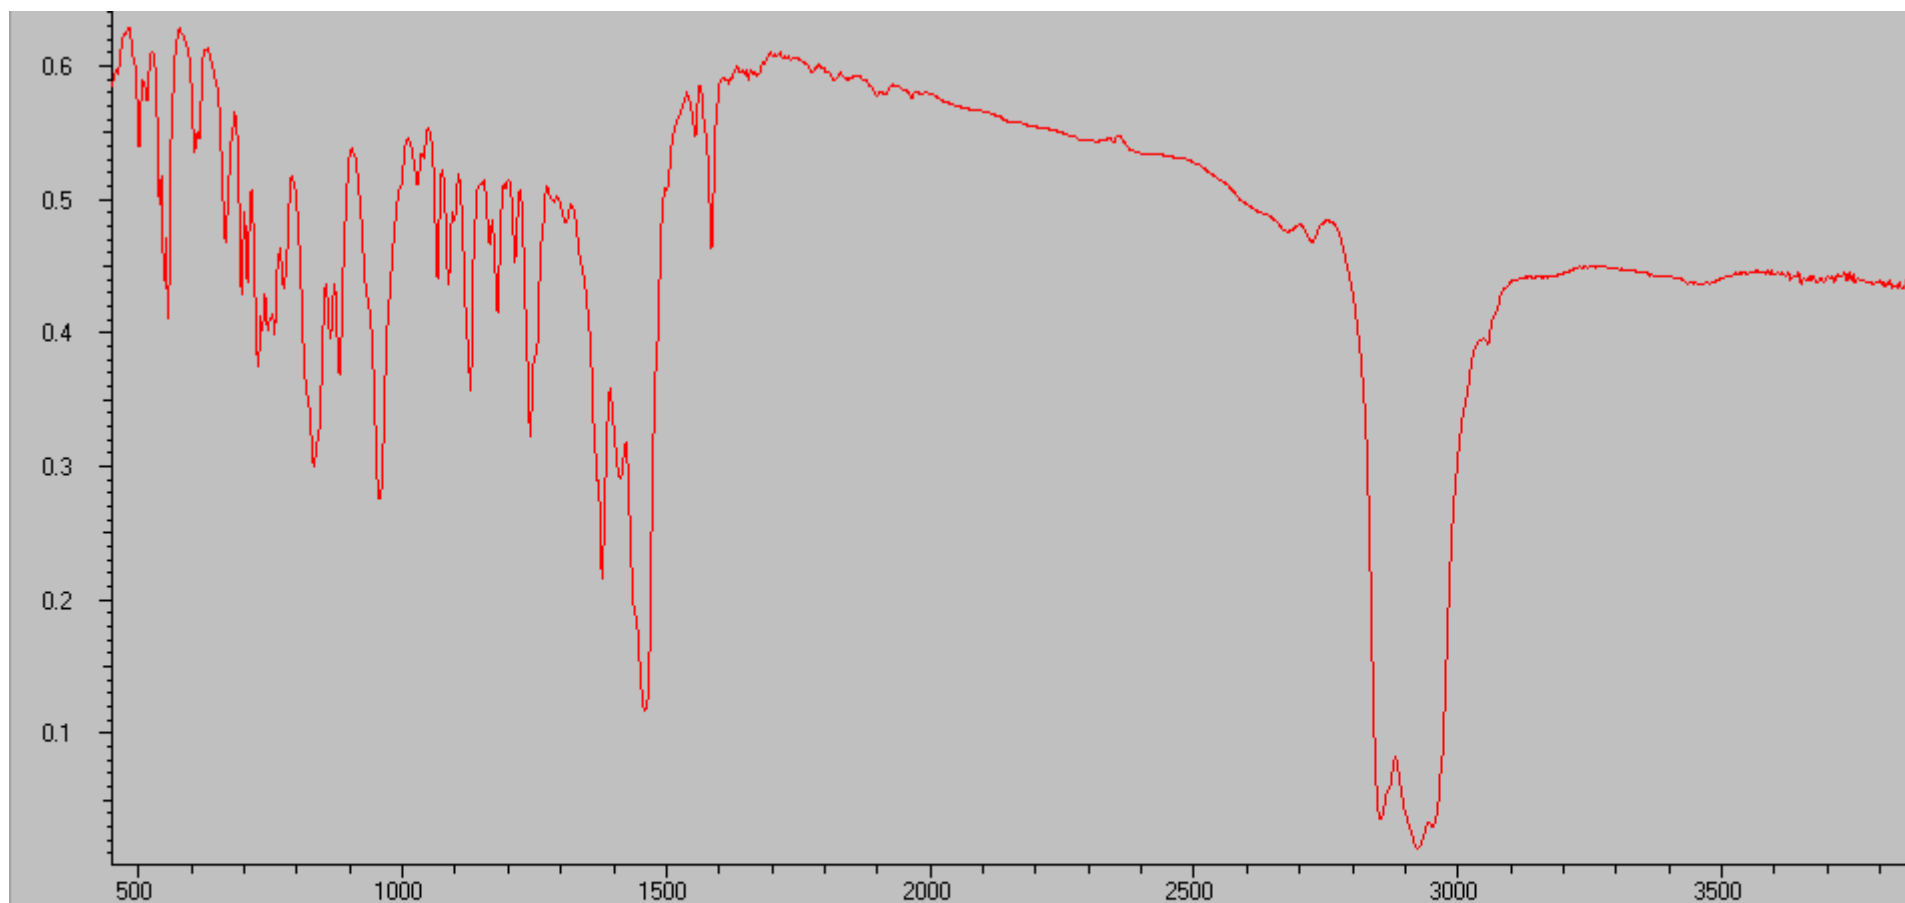

**Figure 4S.** IR spectrum of {2-[Ph<sub>2</sub>P(O)]C<sub>6</sub>H<sub>4</sub>NC(*t*Bu)N(2,6-Me<sub>2</sub>C<sub>6</sub>H<sub>3</sub>)}Y(N(SiMe<sub>3</sub>)<sub>2</sub>)<sub>2</sub> (**2**).

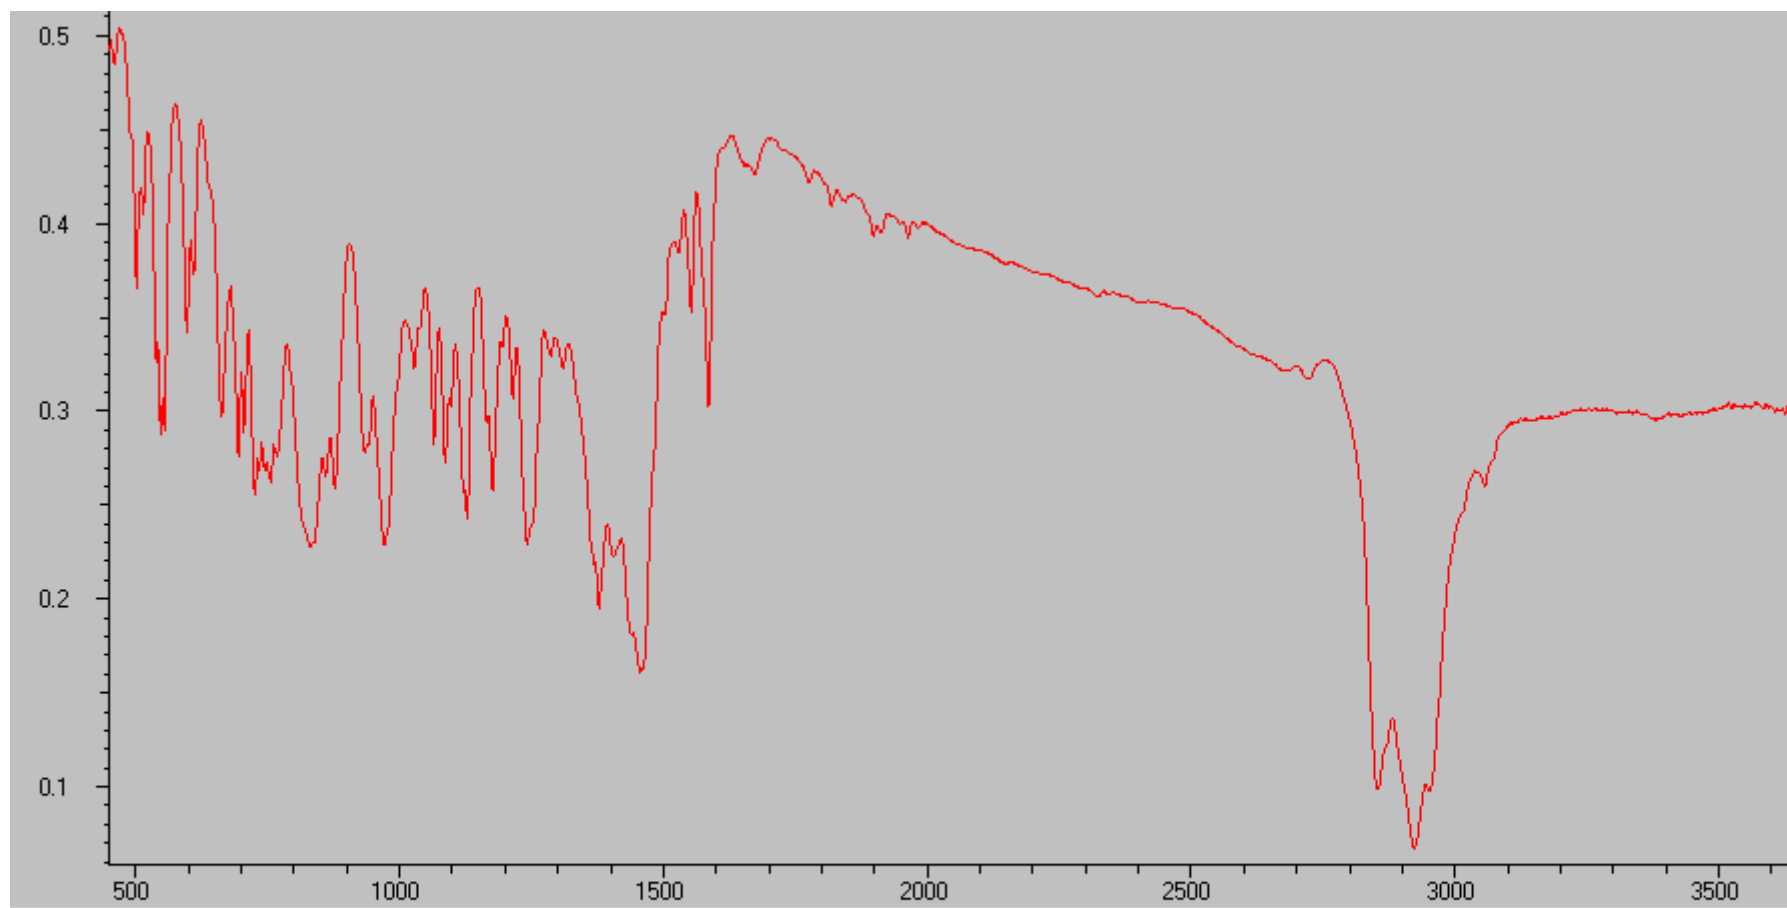

**Figure 5S.** IR spectrum of  $\{2\text{-[Ph}_2\text{P(O)]C}_6\text{H}_4\text{NC}(t\text{Bu)N}(2,6\text{-Me}_2\text{C}_6\text{H}_3)\}\text{Nd}(\text{N}(\text{SiMe}_3)_2)_2$  (**3**).

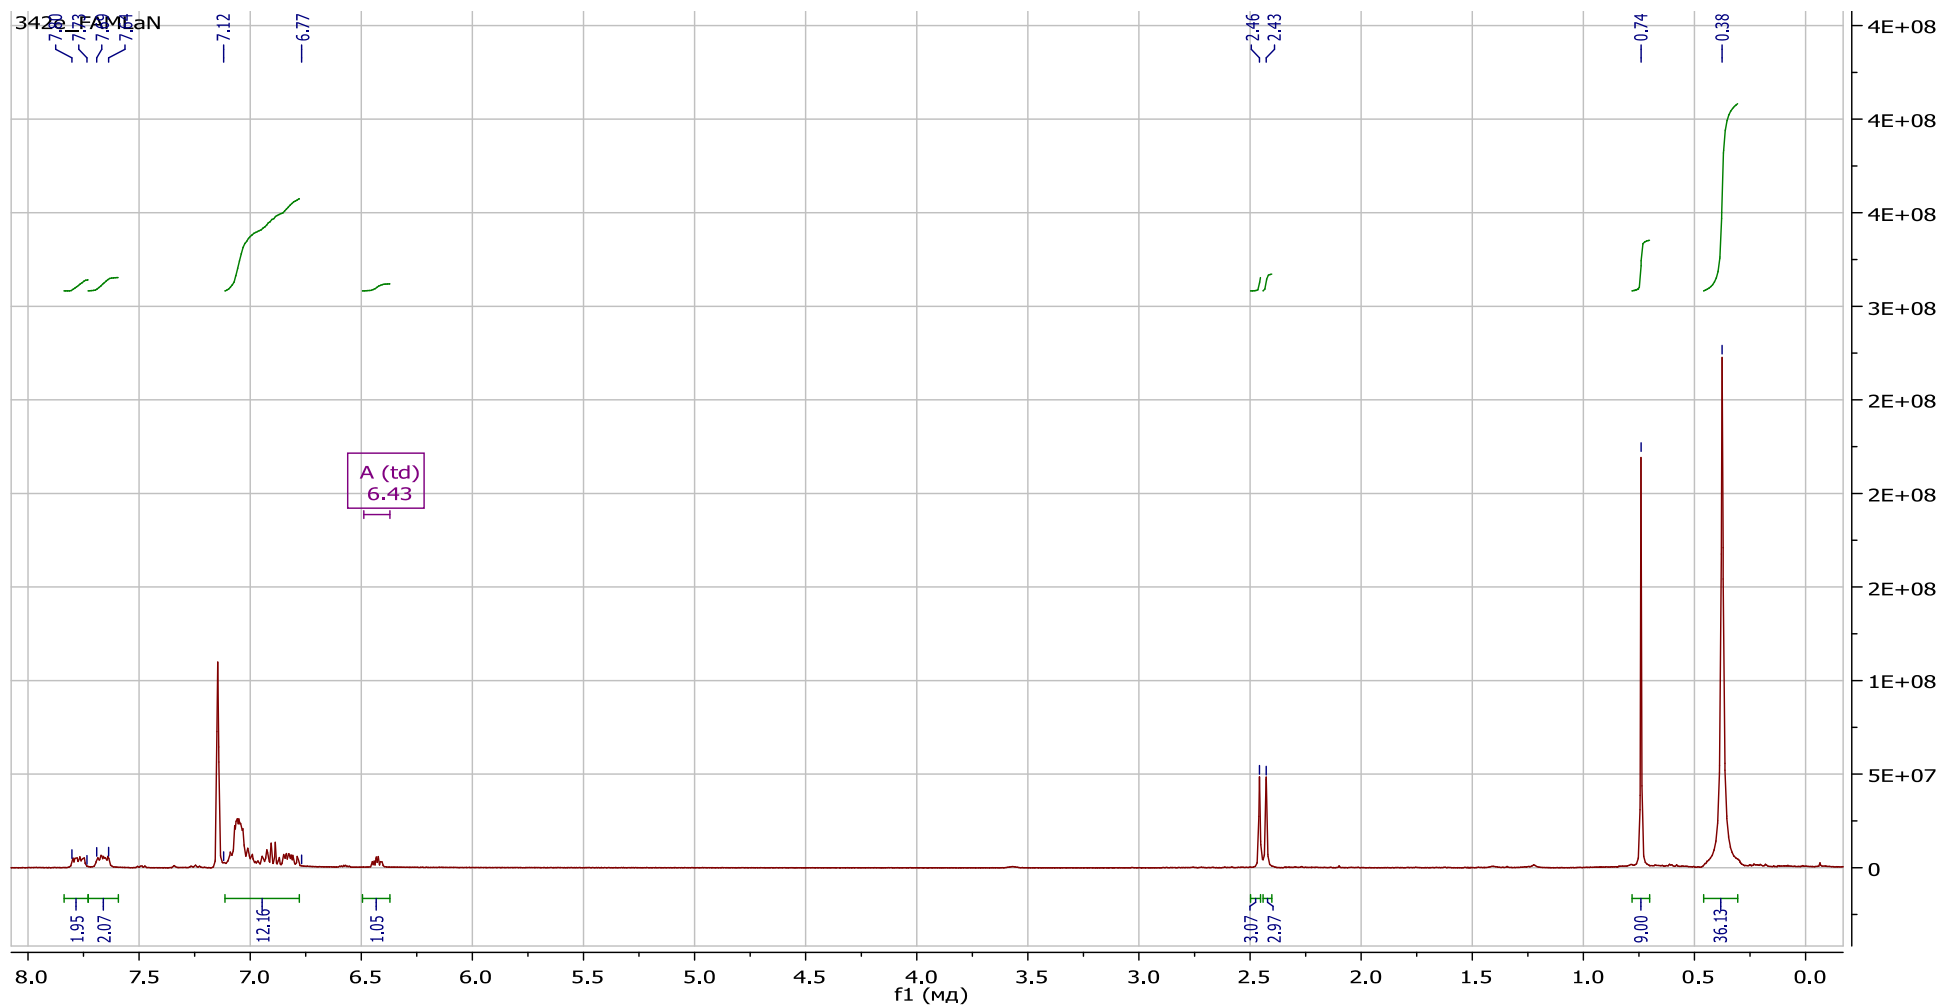

**Figure 6S.**  $^1\text{H}$  NMR spectrum of  $\{2\text{-}[\text{Ph}_2\text{P}(\text{O})\text{C}_6\text{H}_4\text{NC}(t\text{Bu})\text{N}(2,6\text{-Me}_2\text{C}_6\text{H}_3)]\text{La}(\text{N}(\text{SiMe}_3)_2)_2$  (**4**).



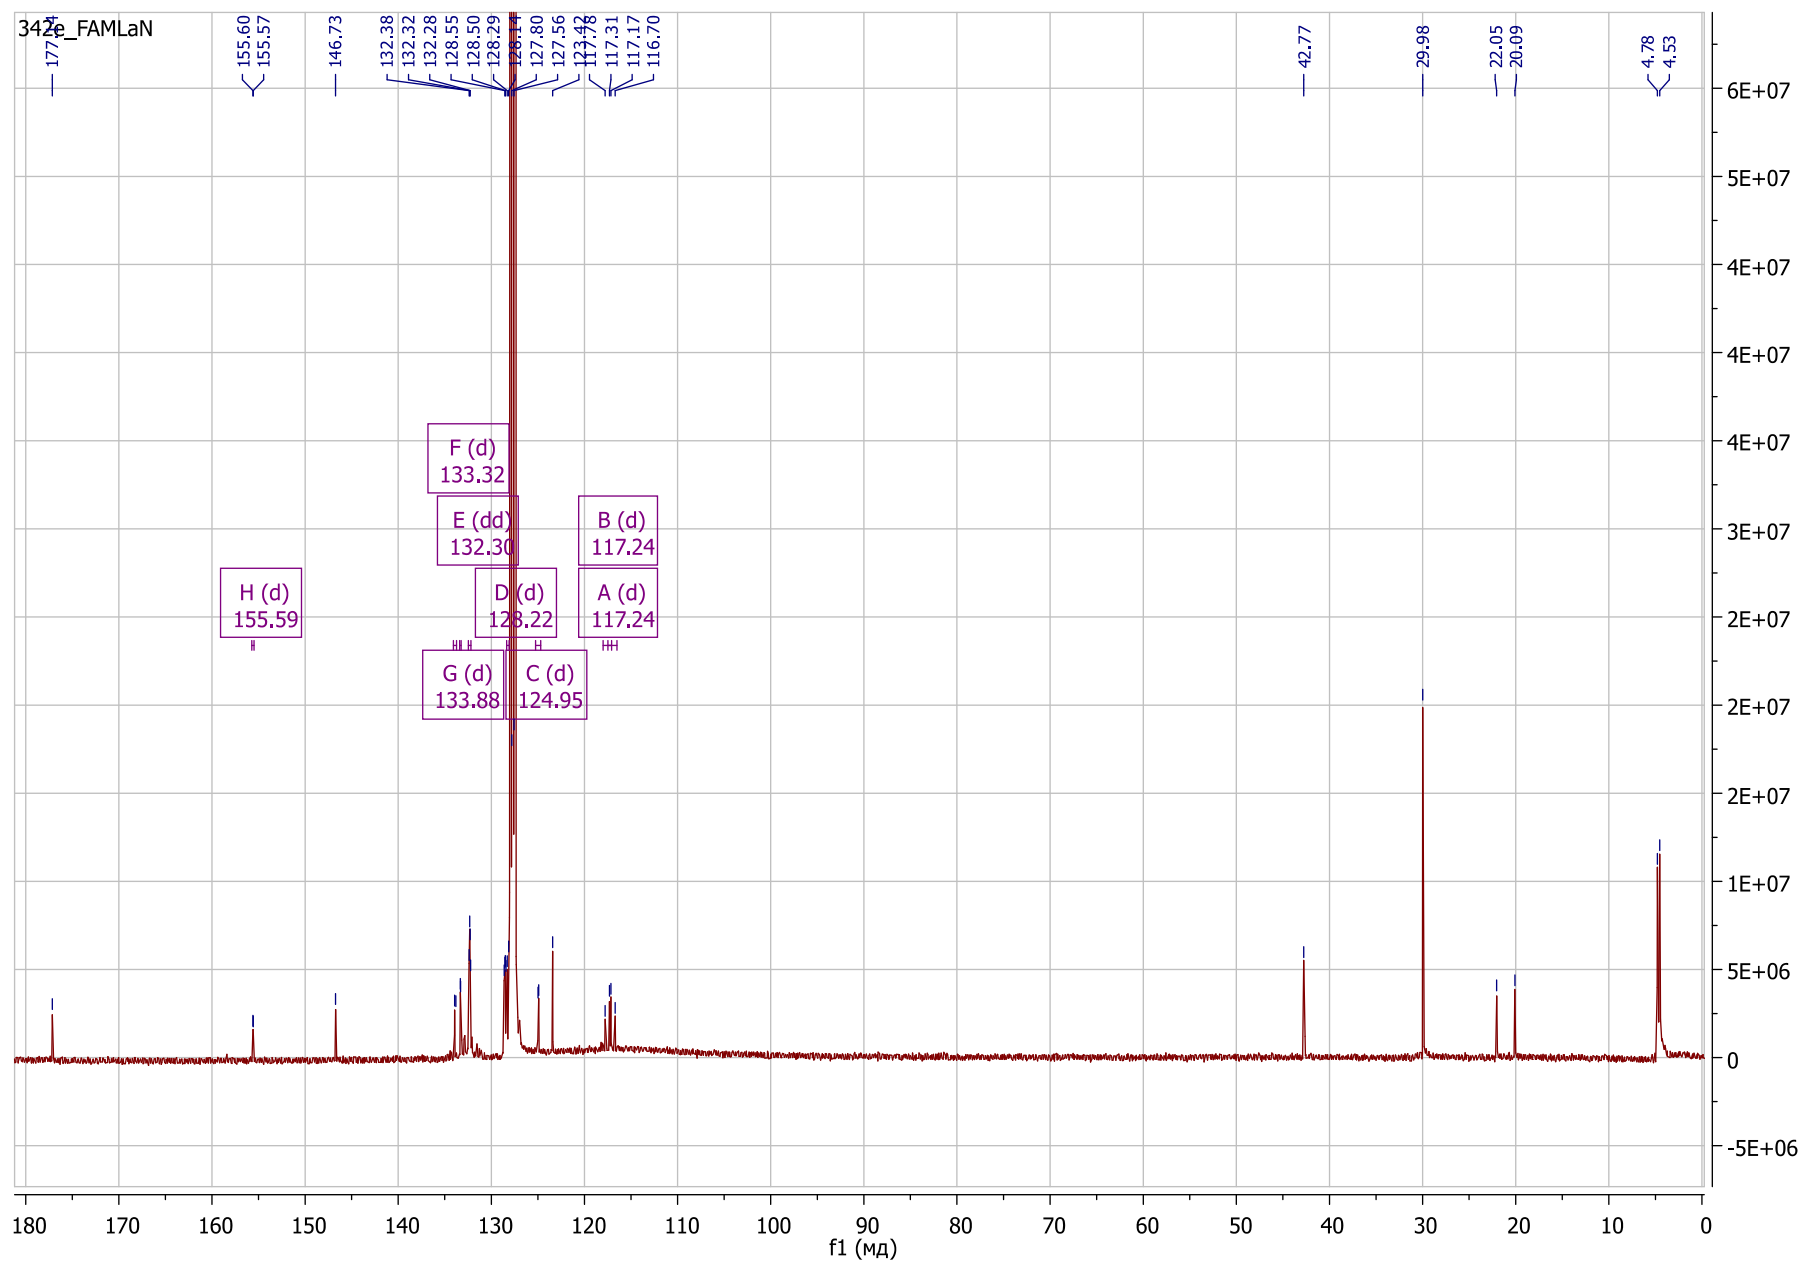

**Figure 7S.**  $^{13}\text{C}$  NMR spectrum of  $\{2\text{-}[\text{Ph}_2\text{P}(\text{O})\text{C}_6\text{H}_4\text{NC}(t\text{Bu})\text{N}(2,6\text{-Me}_2\text{C}_6\text{H}_3)]\text{La}(\text{N}(\text{SiMe}_3)_2)_2$  (**4**).

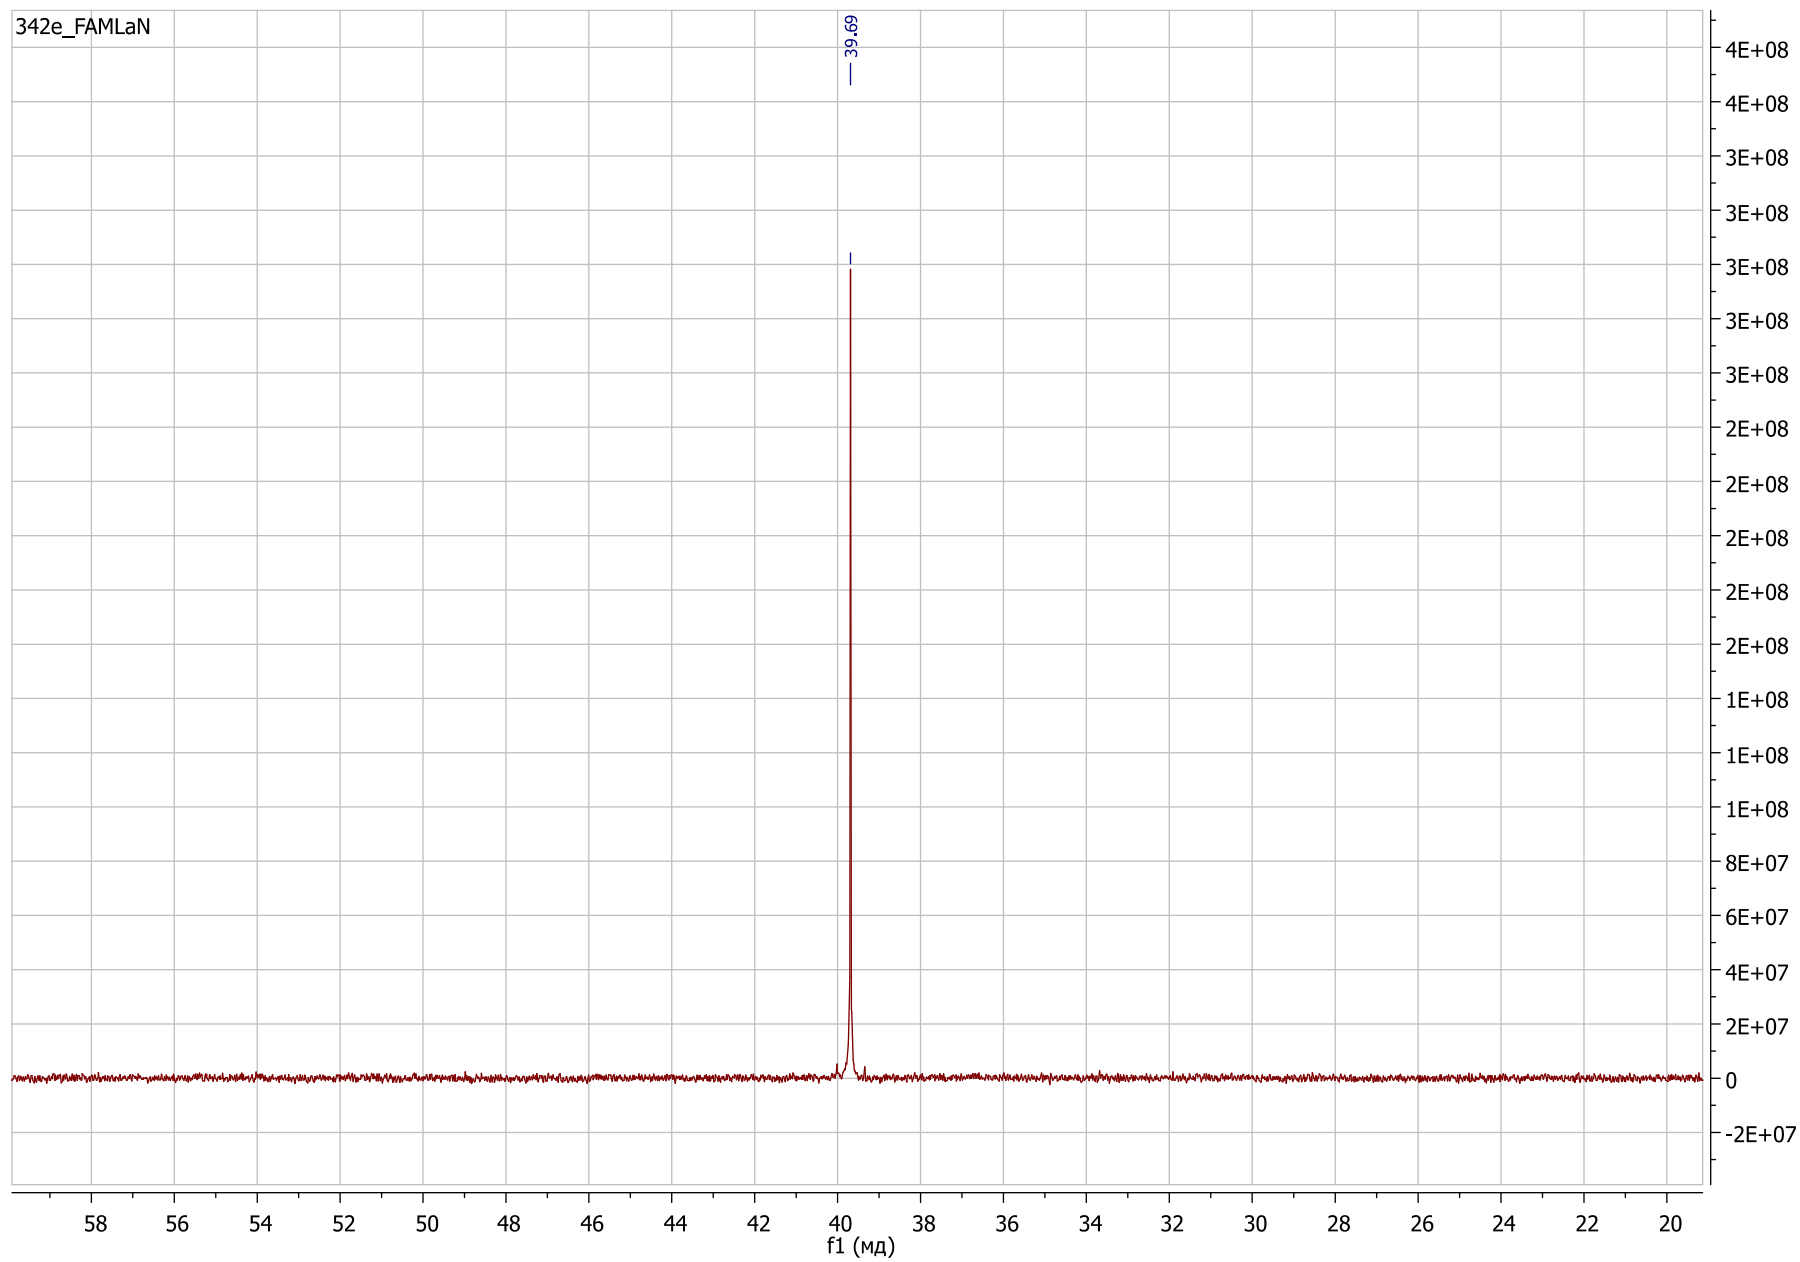

**Figure 8S.**  $^{31}\text{P}$  NMR spectrum of  $\{2\text{-}[\text{Ph}_2\text{P}(\text{O})]\text{C}_6\text{H}_4\text{NC}(t\text{Bu})\text{N}(2,6\text{-Me}_2\text{C}_6\text{H}_3)\}\text{La}(\text{N}(\text{SiMe}_3)_2)_2$  (**4**).

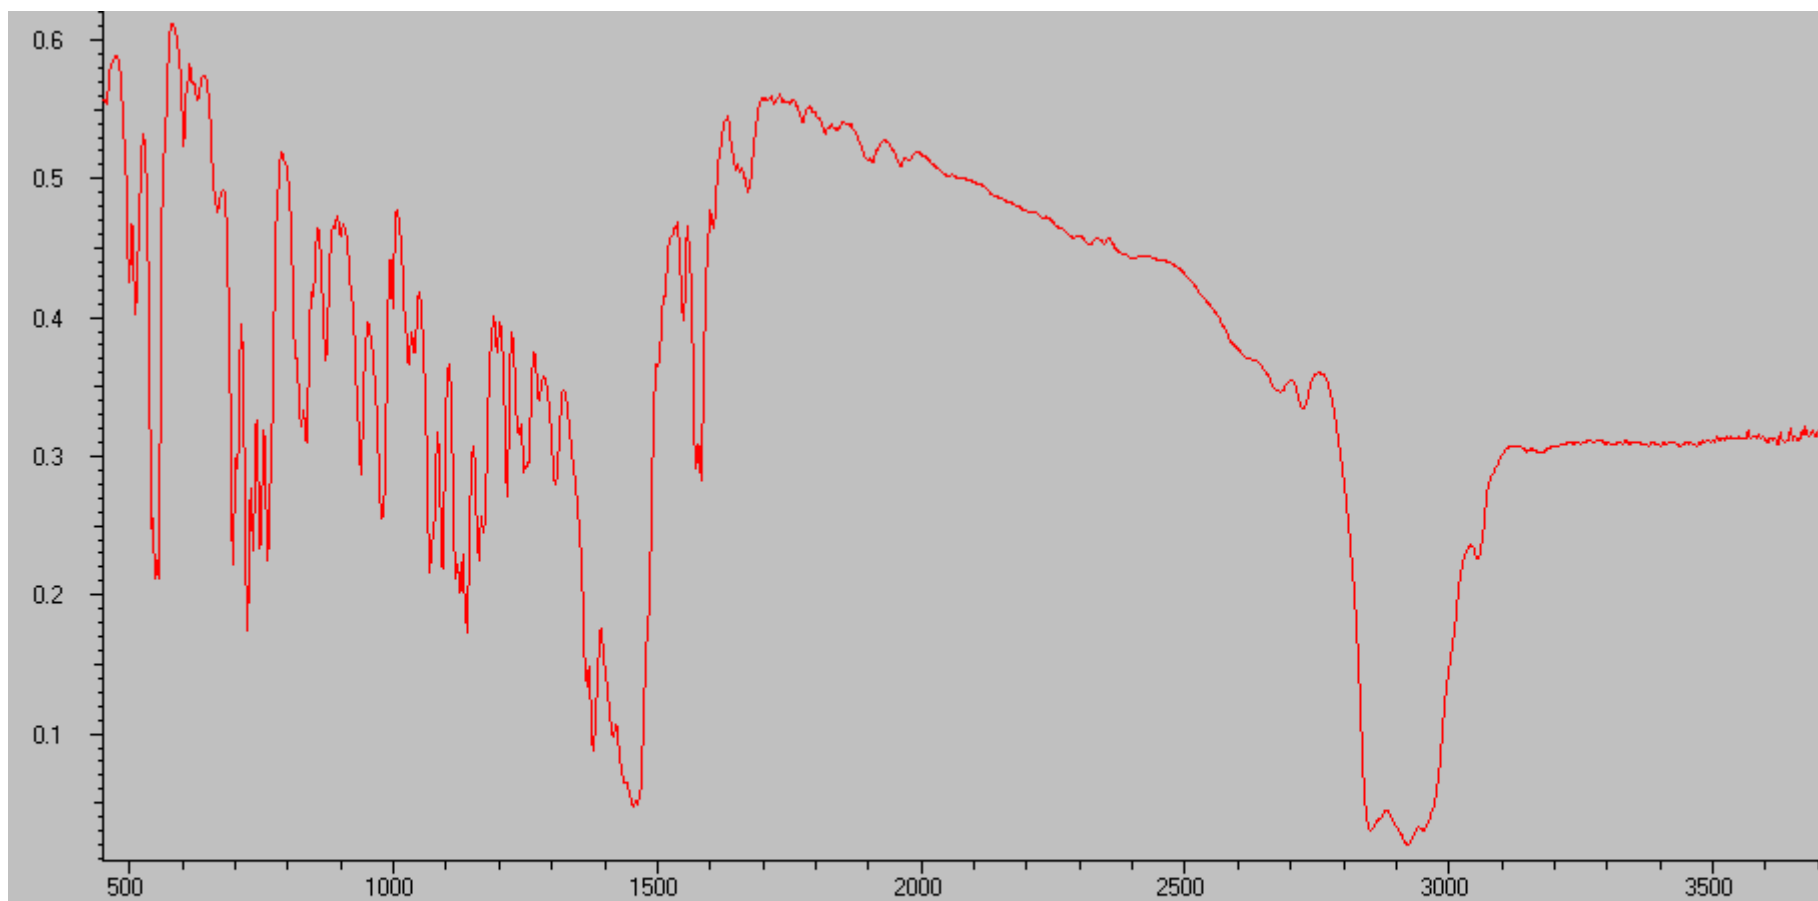

**Figure 9S.** IR spectrum of {2-[Ph<sub>2</sub>P(O)]C<sub>6</sub>H<sub>4</sub>NC(*t*Bu)N(2,6-Me<sub>2</sub>C<sub>6</sub>H<sub>3</sub>)}La(N(SiMe<sub>3</sub>)<sub>2</sub>)<sub>2</sub> (**4**).
